# Supplementary material for: Quantitative Muscle Ultrasonography Using 2D Textural Analysis: A Novel Approach to Assess Skeletal Muscle Structure and Quality in Chronic Kidney Disease
Source: PubMed Central journal article supplement (PMC8114433; doi:10.1177/01617346211009788), 2021-04-15
Supplement: sj-pdf-1-uix-10.1177_01617346211009788.pdf [file sj-pdf-1-uix-10.1177_01617346211009788.pdf]

### Supplementary material 1. Test-retest differences

| N=5                | Test 1          | Re-test         | P†   | ICC  |
|--------------------|-----------------|-----------------|------|------|
| Echo intensity, AU | 48.8 (9.4)      | 46.6 (11.7)     | .212 | .951 |
| ASM, AU            | 0.0007 (0.0002) | 0.0007 (0.0002) | .580 | .671 |
| Entropy, AU        | 7.56 (0.14)     | 7.55 (0.20)     | .708 | .884 |
| IDM, AU            | 0.14 (0.2)      | 0.13 (0.04)     | .467 | .671 |
| Correlation, AU    | 0.001 (0.000)   | 0.002 (0.001)   | .178 | .277 |
| Contrast, AU       | 83.4 (17.8)     | 112.4 (85.8)    | .433 | .400 |

Unless stated otherwise, data shown as mean (standard deviation). ASM = energy or angular second moment; IDM = homogeneity or inverse difference moment; ICC = intraclass correlation coefficient. † = significant difference assessed by paired sample t-test
